# Supplementary material for: Quantitative PCR from human genomic DNA: The determination of gene copy numbers for congenital adrenal hyperplasia and RCCX copy number variation
Source: PubMed Central journal article supplement (PMC9714944; doi:10.1371/journal.pone.0277299), 2022-12-01
Supplement: pone.0277299.s018.pdf [file pone.0277299.s018.pdf]

|                                  |                                                                                                                                                                                                                                                                                                                                                                                                     |
|----------------------------------|-----------------------------------------------------------------------------------------------------------------------------------------------------------------------------------------------------------------------------------------------------------------------------------------------------------------------------------------------------------------------------------------------------|
| ambiguity                        | The state of a measured gene copy number not being close enough to an integer gene copy number to assign the measured gene copy number unambiguously to the integer gene copy number.                                                                                                                                                                                                               |
| concordance                      | The state of an integer gene copy number estimated from measured gene copy number being identical to the genuine integer copy number.                                                                                                                                                                                                                                                               |
| consistency                      | The state of an integer gene copy number estimated from measured gene copy number being identical to another integer copy number, as expected.                                                                                                                                                                                                                                                      |
| copy number variation            | A particular DNA segment occurs once in a haploid chromosome set (a haploid genome) as usual, but the same DNA segment (or very similar ones) may be repeated in a haploid chromosome set. If the number of repeats of a DNA segment varies between haploid chromosome sets, both numerical variants and genomic locus (or loci) of the repeated DNA segments are denoted by copy number variation. |
| gene copy number                 | GCN is the number of repeats of a gene in one or two sets of chromosomes. The vast majority of the genes occurs twice in a diploid genome, but the copy numbers of some genes can differ from two.                                                                                                                                                                                                  |
| misclassification                | The state of an integer gene copy number estimated from measured gene copy number not being identical to the genuine integer gene copy number.                                                                                                                                                                                                                                                      |
| paralogous gene variants         | Paralogous genes (or gene variants) are the copies of the same gene (or very similar ones) with high DNA sequence similarity at the different loci of a haploid chromosome set.                                                                                                                                                                                                                     |
| HERV-K(C4) copy number variation | A deletion copy number variation derived from a virus, called human endogenous retrovirus K, insertion in the intron 9 of complement component 4 genes.                                                                                                                                                                                                                                             |
| RCCX copy number variation       | A tandem, complex, multi-allelic copy number variation on chromosome 6. It is named based on the old names of its genes, <i>RPI-C4-CYP21-TNXB</i> .                                                                                                                                                                                                                                                 |
